# Supplementary material for: Sea cucumber cerebrosides and long-chain bases from Acaudina molpadioides protect against high fat diet-induced metabolic disorders in mice
Source: Royal Society of Chemistry journal article supplement (doi:10.1039/c5fo00602c), 2015-01-01
Supplement: c5fo00602c1.pdf [file c5fo00602c1.pdf]

Table S1

Serum adiponectin and MCP-1 levels of C57BL/6J mice fed experimental diets

|                    | Cont        | HF           | SCC         | LCB         |
|--------------------|-------------|--------------|-------------|-------------|
| Adiponectin, ng/mL | 2.01 ± 0.07 | 1.84 ± 0.12  | 1.93 ± 0.06 | 1.78 ± 0.06 |
| MCP-1, pg/mL       | 151.9 ± 4.7 | 175.2 ± 3.7* | 177.2 ± 2.4 | 175.9 ± 4.5 |

*Note:* Data are presented as mean ± SEM; n = 8 mice per group. \* $p < 0.05$ ,

significant difference compared to the control group determined by

Student's *t* test.
